# Supplementary material
Source: publisher site journal article supplement (http://www.kjim.org/upload/media/kjim-2019-063-suppl3.pdf)
Supplement: Supplementary file 1 [file kjim-2019-063-suppl3.pdf]

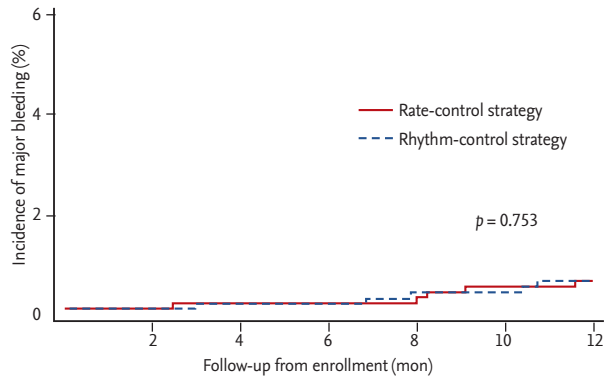

No. at risk

|                                |     |     |     |     |     |     |     |
|--------------------------------|-----|-----|-----|-----|-----|-----|-----|
| Group: Rate-control strategy   | 897 | 893 | 889 | 886 | 882 | 875 | 870 |
| Group: Rhythm-control strategy | 897 | 891 | 889 | 883 | 875 | 869 | 859 |

**Supplementary Figure 2.** Comparison of the cumulative occurrence of major bleeding between the rhythm and rate control strategies.
